1 **The proBAM and proBed standard formats: enabling a seamless integration of**  
2 **genomics and proteomics data**

3

4 **Gerben Menschaert<sup>1,‡,§</sup>, Xiaojing Wang<sup>2,3,‡,§</sup>, Andrew R. Jones<sup>4</sup>, Fawaz Ghali<sup>4,5</sup>,**  
5 **David Fenyö<sup>6,7</sup>, Volodimir Olexiouk<sup>1</sup>, Bing Zhang<sup>2,3</sup>, Eric W. Deutsch<sup>8</sup>, Tobias**  
6 **Ternent<sup>9</sup> and Juan Antonio Vizcaíno<sup>9,§</sup>**

7

8 <sup>1</sup> Department of Mathematical Modeling, Statistics and Bioinformatics, Ghent University,  
9 Ghent, Belgium.

10 <sup>2</sup> Lester and Sue Smith Breast Center, Baylor College of Medicine, Houston, Texas, USA.

11 <sup>3</sup> Department of Molecular and Human Genetics, Baylor College of Medicine, Houston,  
12 Texas, USA.

13 <sup>4</sup> Institute of Integrative Biology, University of Liverpool, Liverpool, United Kingdom.

14 <sup>5</sup> School of Computing, Mathematics and Digital Technology, Manchester Metropolitan  
15 University, Manchester, M1 5GD, United Kingdom.

16 <sup>6</sup> Department of Biochemistry and Molecular Pharmacology, New York University  
17 School of Medicine, New York, New York, USA.

18 <sup>7</sup> Institute for Systems Genetics, New York University School of Medicine, New York,  
19 New York, USA.

20 <sup>8</sup> Institute for Systems Biology, Seattle, WA, USA.

21 <sup>9</sup> European Molecular Biology Laboratory, European Bioinformatics Institute (EMBL-  
22 EBI), Wellcome Trust Genome Campus, Hinxton, Cambridge, CB10 1SD, United  
23 Kingdom.

24 ‡ equally contributing authors

251. § corresponding authors

26

27 To whom correspondence may be addressed: Dr. Gerben Menschaert, Department of  
28 Mathematical Modelling, Statistics and Bioinformatics, Ghent University, Coupure links  
29 653, 9000 Gent, Belgium. Tel +3292649922; E-mail: [Gerben.Menschaert@ugent.be](mailto:Gerben.Menschaert@ugent.be). Dr.  
30 Xiaojing Wang, Lester and Sue Smith Breast Center, Baylor College of Medicine,  
31 Houston, Texas, USA; and Department of Molecular and Human Genetics, Baylor  
32 College of Medicine, Houston, Texas, USA. E-mail: [Xiaojing.Wang@bcm.edu](mailto:Xiaojing.Wang@bcm.edu). Dr. Juan  
33 Antonio Vizcaíno, European Molecular Biology Laboratory, European Bioinformatics  
34 Institute (EMBL-EBI), Wellcome Trust Genome Campus, Hinxton, Cambridge, CB10  
35 1SD, United Kingdom. E-mail: [juan@ebi.ac.uk](mailto:juan@ebi.ac.uk).

36

37

38 **Summary**

39

40 On behalf of The Human Proteome Organization (HUPO) Proteomics Standards  
41 Initiative (PSI), we are here introducing two novel standard data formats, proBAM and  
42 proBed, that have been developed to address the current challenges of integrating mass  
43 spectrometry based proteomics data with genomics and transcriptomics information in  
44 proteogenomics studies. proBAM and proBed are adaptations from the well-defined,  
45 widely used file formats SAM/BAM and BED respectively, and both have been extended  
46 to meet specific requirements entailed by proteomics data. Therefore, existing popular  
47 genomics tools such as SAMtools and Bedtools, and several very popular genome  
48 browsers, can be used to manipulate and visualize these formats already out-of-the-box.  
49 We also highlight that a number of specific additional software tools, properly supporting  
50 the proteomics information available in these formats, are now available providing  
51 functionalities such as file generation, file conversion, and data analysis. All the related  
52 documentation to the formats, including the detailed file format specifications, and  
53 example files are accessible at <http://www.psidev.info/probam> and  
54 <http://www.psidev.info/probed>.

55

56

57 **Introduction**

58

59 Mass spectrometry (MS) based proteomics approaches have advanced enormously over  
60 the last decade, and are becoming increasingly prominent as an essential tool for post-  
61 genomic research. Proteomics approaches enable the identification, quantification and  
62 characterization of proteins, peptides, and post-translational protein modifications  
63 (PTMs) such as phosphorylation, providing information about protein expression and  
64 functional states [1]. Despite the instrumental role of the underlying genome in  
65 proteomics data analysis, it is only relatively recently when the field of proteogenomics  
66 started to gain prominence [2-4].

67

68 In proteogenomics, proteomics data is combined with genomics and/or transcriptomics  
69 information, typically by using sequence databases generated from DNA sequencing  
70 efforts, RNA-Seq experiments [5], Ribo-Seq approaches [6, 7], and long-non-coding  
71 RNAs [8], among others, in the MS-based identification process. Peptide sequences are  
72 mapped back to gene models *via* their genomic coordinates, demonstrating evidence of  
73 new translational events (e.g. novel splice junctions). Proteogenomics studies can be used  
74 to improve genome annotation and are increasingly utilized to understand the information  
75 flow from genotype to phenotype in complex diseases such as cancer [9-11] and to  
76 support personalized medicine studies [12].

77

78 Since 2002, the Proteomics Standards Initiative (PSI, <http://www.psidev.info>) of the  
79 Human Proteome Organization (HUPO) [13] has taken the role of developing open

80 community standard file formats for different aspects of MS based proteomics analysis  
81 and data types. At present, well-established data standards are available for instance, for  
82 representing raw MS data (the mzML data format [14]), peptide and protein  
83 identifications (mzIdentML [15] and mzTab [16]) and quantitative information  
84 (mzQuantML [17] and mzTab).

85

86 The existence of compatible and interoperable data formats is a way to facilitate and  
87 advance “multi-omics” studies, and a clear need in proteogenomics, due to the growing  
88 importance of the field [9, 10, 18, 19]. However, no standard file format had been  
89 established so far for proteogenomics data exchange. To address this problem, we here  
90 present two novel standard data formats called proBAM and proBed. As suggested by  
91 their names, these two formats are adapted from their genomics counterparts BAM/SAM  
92 [20, 21] and BED (Browser Extensible Data) [22], where proBAM stands for proteomics  
93 BAM file (compressed binary version of the Sequence Alignment/Map (SAM) format)  
94 and proBed stands for proteomics BED file. A key feature of these formats is that they  
95 can seamlessly accommodate both regular genomic mapping information and specifics  
96 related to proteomics data, i.e. peptide-to-spectrum matches (PSM) or peptide sequence  
97 information. Existing popular genomics tools as SAMtools [20, 21] and Bedtools [23,  
98 24], or the most widely used genome browsers such as Ensembl [25], the University of  
99 California Santa Cruz (UCSC) Genome Browser [26], JBrowse [27] and the Integrative  
100 Genomics Viewer (IGV) [28], can be used to manipulate and visualize proteomics data in  
101 these formats already. We believe that both proBAM and proBed are essential to merge

102 the growing amount of proteomics information with the available  
103 genomics/transcriptomics data.

104

## 105 **Experimental Procedures**

106 The development of these data formats has taken place since 2014 and it has been an  
107 open process *via* conference calls and discussions at the PSI annual meetings. Both  
108 format specifications have been submitted to the PSI document process [29] for review.

109 The overall goal of this process, analogous to an iterative scientific manuscript review, is  
110 that all formalized standards are thoroughly assessed. This process is handled by the PSI  
111 Editor and external reviewers who can provide feedback on the format specifications.  
112 Additionally, there is a phase for public comments, ensuring the involvement of  
113 heterogeneous points of view from the community.

114

115 Both formats use Controlled Vocabulary (CV) terms and definitions as part of the PSI-  
116 MS CV [30], also used in other PSI data formats. All the related documentation,  
117 including the detailed file format specifications and example files, are available at  
118 <http://www.psidev.info/probam> and <http://www.psidev.info/probed>.

119

## 120 **Overview of the proBAM and proBed formats**

121 The proteogenomics formats proBAM and proBed are designed to store a genome-centric  
122 representation of proteomics data (Figure 1). As mentioned above, both formats are  
123 highly compatible with their originating genomics counterparts, thus benefiting already  
124 from a plethora of existing tools developed by the genomics community.

125

126 *proBAM overview*

127 The BAM format was originally designed to hold alignments of short DNA or RNA reads  
128 to a reference genome [20, 21]. A BAM file typically consists of a header section storing  
129 metadata and an alignment section storing mapping data (Figure 1, Figure 2 and  
130 Supplemental Table 1). The metadata can include information about the sample identity,  
131 technical parameters in data generation (such as library, platform, etc) and data  
132 processing (such as mapping tool used, duplicate marking, etc). Essential information  
133 includes where reads are aligned, how good the alignment is and the quality of the reads.  
134 Specific fields or tags are designed to represent or encode such information. The  
135 proBAM format inherits all these features. In this case, sequencing reads are replaced by  
136 PSMs (see proBAM specification document for full details, <https://goo.gl/EW1cqB>).  
137 It should be noted that, since the tags used in BAM usually have recognized meanings,  
138 we did not attempt to repurpose any of them but rather created new ones to accommodate  
139 specific proteomics data types such as PSM scores, charge states, and protein PTMs  
140 (Figure 2 and proBAM specification document section 4.4.1 for full description on PSM  
141 specific tags). We also envisioned that additional fields and tags may be necessary to hold  
142 additional aspects of proteomics data. We thus designed a “Z?” tag as an extension  
143 anchor. Analogously to proBed, the format can also accommodate peptides (as groups of  
144 PSMs with the same peptide sequence). At the moment of writing, the proBAM format is  
145 under review as part of the PSI document process (<http://www.psidev.info/probam>). *As a*  
146 *note to editors and reviewers, we are aiming to conclude the PSI review at the same time*

147 *as the manuscript describing proBAM/proBed is deemed suitable for publication, at*  
148 *which point we can announce a finalized standard.*

149

150 *proBed overview*

151 The original BED format (<https://genome.ucsc.edu/FAQ/FAQformat.html#format1>),  
152 developed by the UCSC, provides a flexible way to define data lines that can be  
153 displayed as annotation tracks. proBed is an extension to the original BED file format  
154 [26]. In BED, data lines are formatted in plain text with white-space separated fields.  
155 Each data line represents one item mapped to the genome. The first three fields  
156 (corresponding to genomic coordinates) are mandatory, and an additional 9 fields are  
157 standardized and commonly interpreted by genome browsers and other tools, totalling 12  
158 BED fields, re-used here. The proBed format includes a further 13 fields to describe  
159 information primarily on peptide-spectrum matches (PSMs) (Figure 1, Figure 2 and  
160 Supplemental Table 1). The format can also accommodate peptides (as groups of PSMs  
161 with the same peptide sequence), but in that case, some assumptions need to be taken in  
162 some of the fields (see proBed specification document Section 6.8 for details,  
163 <https://goo.gl/FM2w66>). At the moment of writing, the proBed format has completed the  
164 PSI internal review process, so the first version of the standard has been formalized  
165 (version 1.0, <http://www.psidev.info/probed>).

166

167 *Distinct features of proBAM and proBed and their use cases*

168 The proBAM and proBed formats differ in similar ways as their genomic counterparts do,  
169 although representing analogous information. In fact, proBAM and proBed are



170 complementary and have different use cases. Figure 3 shows two examples of proBAM  
171 and proBed visualization tracks of the same datasets. An IGV and Ensembl visualization  
172 are presented including multiple splice-junction peptides (Figure 3.A) and a novel  
173 translation initiation event in the HDGF gene locus (Figure 3.B), respectively.

174 Similar to the designed purposes of SAM/BAM, the basic concepts behind the proBAM  
175 format are: i) to provide genome coordinates as well as detailed mapping information,  
176 including CIGAR, flag, nucleotide sequences, etc; ii) to hold richer proteomics related  
177 information; and iii) to serve as a well-defined interface between PSM identification and  
178 downstream analyses. Therefore, the proBAM format contains much more information  
179 about the peptide-gene mapping statuses as well as PSM related information, when  
180 compared to proBed. Peptide and nucleotide sequences are inherently embedded in  
181 proBAM, which can be useful for achieving improved visualization by tools such as IGV.  
182 This feature enables intuitive display of the coverage of a region of interest, peptides at  
183 splice junctions, single nucleotide/amino acid variation, and alternative spliced isoforms  
184 (Figure 3), among others. Therefore, proBAM can hold the full MS proteomics result set,  
185 whereupon further downstream analysis can be performed: gene-level inference [31],  
186 basic spectral count based quantitative analysis, reanalysis based on different scoring  
187 systems and/or FDR (False Discovery Rate) thresholds.

188 The proBed format, on the other hand, is more tailored for storing only the final results of  
189 a given proteogenomics analysis, without providing the full details. The BED format is  
190 commonly used to represent genomic features. Thus, proBed stores browser track  
191 information at the PSM and/or peptide level mainly for visualisation purposes. As a key  
192 point, proBed files can be converted to BigBed [32], a binary format based on BED,

193 which represents a feasible way to store the same information present in BED as  
194 compressed binary files, and is the final routinely used format as annotation tracks. It  
195 should be noted that a proBAM to proBed conversion should be possible, and vice versa.  
196 However, “null” values for some of the Tags would be logically expected for the  
197 mapping from proBed to proBAM.

198

### 199 *Software implementations*

200 Both proBAM and proBed are fully compatible out-of-the-box with existing tools  
201 designed for the original SAM/BAM and BED files. Therefore, existing popular tools in  
202 the genomics community can readily be applied to read, merge and visualize these  
203 formats (Table 1). As mentioned already, several stand-alone and web genome browsers  
204 are available to visualize these formats e.g. UCSC browser, Ensembl, Integrative  
205 Genomics Viewer, and JBrowse.

206

207 Routinely used command line tools as SAMtools allow to manipulate (index, merge, sort)  
208 alignments in proBAM. Bedtools, seen as the “Swiss-army knife” tools for a wide-range  
209 of genomic analysis tasks, allows similar actions to both formats, including among others,  
210 intersection, merging, count, shuffling and conversion functionality. With the UCSC  
211 ‘bedToBigBed’ converter tool (<http://hgdownload.soe.ucsc.edu/admin/exe/>), one can also  
212 convert the proBed to bigBed. In this context, it is important to note that bedToBigBed  
213 version 2.87 is highlighted in the proBed format specification as the reliable version that  
214 can be used to create bigBed files coming from proBed (version 1.0) files.

215

216 **Table1.** Existing software implementations of the proBAM and proBed formats (by June  
217 2017).

| Name                                     | Description                                                                                                        | URL                                                                                                                                           | purpose                   |
|------------------------------------------|--------------------------------------------------------------------------------------------------------------------|-----------------------------------------------------------------------------------------------------------------------------------------------|---------------------------|
| <b>ms-data-core-api</b> *                | Open-source Java library to handle different proteomics data standard formats                                      | <a href="https://github.com/PRIDE-E-Utilities/ms-data-core-api">https://github.com/PRIDE-E-Utilities/ms-data-core-api</a>                     | <b>write/<br/>convert</b> |
| <b>PGConverter</b> *                     | Command-line tool to convert between the following formats:<br>mzIdentML -> mzTab -> proBed -> bigBed              | <a href="https://github.com/PRIDE-E-Toolsuite/PGConverter">https://github.com/PRIDE-E-Toolsuite/PGConverter</a>                               |                           |
| <b>proBAMr</b> *                         | Bioconductor package to convert MS-shotgun identification results into proBAM                                      | <a href="http://bioconductor.org/packages/release/bioc/html/proBAMr.html">http://bioconductor.org/packages/release/bioc/html/proBAMr.html</a> |                           |
| <b>proBAMconvert</b> *                   | Command-line and GUI tool to create proBAM or proBed from mzIdentML, mzTab or pepXML.                              | <a href="http://probam.biobix.be/">http://probam.biobix.be/</a>                                                                               |                           |
| <b>UCSC Genome Browser</b>               | Web-based genome browser                                                                                           | <a href="https://genome.ucsc.edu/">https://genome.ucsc.edu/</a>                                                                               | <b>visualize</b>          |
| <b>Ensembl</b>                           | Web-based genome browser                                                                                           | <a href="http://www.ensembl.org/">http://www.ensembl.org/</a>                                                                                 |                           |
| <b>Integrative Genomics Viewer (IGV)</b> | Stand-alone, high-performance visualization tool for interactive exploration of large, integrated genomic datasets | <a href="http://software.broadinstitute.org/software/igv/">http://software.broadinstitute.org/software/igv/</a>                               |                           |
| <b>JBrowse</b>                           | Embeddable genome browser built completely with JavaScript and                                                     | <a href="http://jbrowse.org/">http://jbrowse.org/</a>                                                                                         |                           |

|                      |                                                                                                                                      |                                                                                                             |                   |
|----------------------|--------------------------------------------------------------------------------------------------------------------------------------|-------------------------------------------------------------------------------------------------------------|-------------------|
|                      | HTML5                                                                                                                                |                                                                                                             |                   |
| <b>SAMtools</b>      | Tool package that provides various utilities for manipulating alignments in the SAM format (including sorting, merging and indexing) | <a href="http://samtools.sourceforge.net/">http://samtools.sourceforge.net/</a>                             | <b>manipulate</b> |
| <b>Bedtools</b>      | A “Swiss-army knife” of tools for a wide-range of genomics analysis tasks                                                            | <a href="http://bedtools.readthedocs.io/en/latest/">http://bedtools.readthedocs.io/en/latest/</a>           |                   |
| <b>proBAMtools *</b> | R package to perform downstream analysis of proBAM files                                                                             | <a href="http://proteogenomics.zhong-lab.org/">http://proteogenomics.zhong-lab.org/</a>                     | <b>analyse</b>    |
| <b>PGConverter *</b> | It contains a proBed validation module                                                                                               | <a href="https://github.com/PRIDE-Toolsuite/PGConverter">https://github.com/PRIDE-Toolsuite/PGConverter</a> | <b>validate</b>   |
| <b>BamUtil</b>       | An original SAM/BAM format validation package                                                                                        | <a href="https://github.com/statge/n/bamUtil">https://github.com/statge/n/bamUtil</a>                       |                   |

218 \* Software supports full features of the format (including proteomics information).

219

220 There is also software specifically written for proBAM and proBed, supporting all the  
 221 proteomics related features. In fact, proteogenomics data encoded in the PSI standard  
 222 formats mzIdentML and mzTab can be converted into proBAM and proBed, although it  
 223 should be noted that the representation for proteogenomics data in mzIdentML has only  
 224 been formalized recently [33]. In this context, first of all, the open-source Java library  
 225 ms-data-core-api, created to handle different proteomics file formats using the same  
 226 interface, can be used to write proBed [34]. A Java command line tool, PGConverter  
 227 (<https://github.com/PRIDE-Toolsuite/PGConverter>), is also able to convert from

228 mzIdentML and mzTab to proBed and bigBed. Analogously, several tools are available  
229 to write proBAM files, such as the Bioconductor proBAMr package. An additional R  
230 package, called proBAMtools, is also available to analyze fully exported MS-based  
231 proteomics results in proBAM [31]. proBAMtools was specifically designed to perform  
232 various analyses using proBAM files, including functions for genome-based proteomics  
233 data interpretation, protein and gene inference, count-based quantification, and data  
234 integration. It also provides a function to generate a peptide-based proBAM file coming  
235 from a PSM-based one.

236 ProBAMconvert is another intuitive tool that enables the conversion from mzIdentML,  
237 mzTab and pepXML (another popular proteomics open format) [35] to both peptide- or  
238 PSM-based proBAM and proBed (<http://probam.biobix.be>) [36]. It is available as a  
239 command line interface (CLI) and a graphical user interface (GUI for Mac OS X,  
240 Windows and Linux). As CLI it is also wrapped in a Bioconda package  
241 (<https://bioconda.github.io/recipes/probamconvert/README.html>) and in a Galaxy tool,  
242 available from the public test toolshed  
243 (<https://testtoolshed.g2.bx.psu.edu/view/galaxy/probamconvert>). The PGConverter tool  
244 also allows the validation of proBed files. For proBAM files, a validator is available that  
245 checks the validity of the original SAM/BAM format  
246 (<https://github.com/statgen/bamUtil>), although additional proteogenomics data  
247 verification still needs to be implemented.

248

249 **Discussion**

250 We strongly believe that having available these two novel data formats (proBAM and  
251 proBed) constitutes an essential milestone for the continuous development of the field of  
252 proteogenomics. Successful promotion of proBAM and proBed requires support from  
253 software vendors, individual investigators, publishers, and data repositories. We will  
254 promote them following the typical channels used by the PSI. Therefore, further efforts  
255 will be focused on implementing these formats, not only using newly generated  
256 proteomics data but also on datasets already available in the public domain. In this  
257 context it is important to highlight that MS-based proteomics datasets are now routinely  
258 deposited in public repositories such as PRIDE [37], PeptideAtlas [38], MassIVE  
259 (<https://massive.ucsd.edu>) and jPOST [39] gathered in the ProteomeXchange Consortium  
260 (<http://www.proteomechange.org> [40]). In fact, an enormous amount of MS data is  
261 available in the public domain that can be used for proteogenomics studies, something  
262 that it is increasingly happening [41, 42]. The PRIDE database, located in the European  
263 Bioinformatics Institute (EMBL-EBI), plans to fully implement proBed in the coming  
264 months, facilitating the integration and visualisation of public proteomics data in  
265 Ensembl. In this context, it is also important to note that proBAM files generated from  
266 several large proteomics datasets have been already preloaded in a JBrowse-based  
267 genome browser (<http://proteogenomics.zhang-lab.org/>), facilitating the access to this  
268 data to a broader audience, both within and outside the proteomics community.

269

270 Additionally, we have already been actively pushing the use of these formats in big  
271 Consortia such as Clinical Proteomic Tumor Analysis Consortium (CPTAC). We hope  
272 the data released by such projects will inspire new tools that support these two formats.

273 We expect that their existence will facilitate integration, visualization and exchange  
274 throughout both the proteomics and genomics communities, and will help multiple  
275 proteogenomics endeavours in trying to interpret proteomics results and/or refine gene  
276 model annotation by means of protein level validation.

277

278 The formats will be fully maintained by the PSI group using the strategy applied for all  
279 existing standard formats. If changes in the formats were needed that would not make  
280 them compatible with existing software, the formats would change their version number,  
281 and they would re-enter a new round of review in the PSI document process. Some future  
282 possible expansions for both formats could consider extended mechanisms to encode  
283 quantitative proteomics data. There is a mechanism to report PSM counts in proBed, but  
284 it is limited at present. Additionally, PSM counts can be calculated, at both gene and  
285 protein levels, from proBAM files. In the future, quantification support could be extended  
286 to additional workflows (e.g. intensity-based approaches).

287

288 We also highly encourage proteogenomics data providers to report PSMs to these two  
289 formats as part of their data exports, so it can be visualized by genome browsers directly  
290 and it is possible to re-analyse it within a genome context. We expect that the release and  
291 usage of proBed and proBAM will increase data sharing and integration between both the  
292 genomics and proteomics communities. The PSI remains a free and open consortium of  
293 interested parties, and we encourage critical feedback, suggestions and contributions *via*  
294 attendance at a PSI annual meeting, conference calls or our mailing lists (see  
295 <http://www.psidev.info/>).

296

## 297 **Acknowledgements**

298

299 J.A.V., T.T., A.R.J. and F.G. want to acknowledge funding by the BBSRC grants  
300 “ProteoGenomics” [grant number BB/L024225/1] and “PROCESS” [grant number  
301 BB/K01997X/1], and A.R.J. wants to acknowledge BBSRC grant BB/L005239/1. G.M.  
302 is a Fellow of the Research Foundation – Flanders (FWO-Vlaanderen)  
303 [G.M.,12A7813N]. X.W. and B.Z. are supported by National Cancer Institute award  
304 U24CA159988 and U24CA210954. E.W.D. acknowledges funding from NIGMS grant  
305 number R01GM087221 and NIBIB grant number U54EB020406. D.F. is supported by  
306 National Cancer Institute award U24CA210972 and by contract 13XS068 from Leidos  
307 Biomedical Research, Inc. Finally, the colleagues in the Proteomics Standards Initiative,  
308 including the reviewers of the proBAM and proBed format specifications in the PSI  
309 document process, are acknowledged for helpful discussions and feedback. We also want  
310 to thank Andy Yates (Ensembl team), for his useful comments.

311

312 The author(s) declare(s) that they have no competing interests.

313

## 314 **References**

315

- 316 1. Aebersold R, Mann M: **Mass-spectrometric exploration of proteome structure and**  
317 **function.** *Nature* 2016, **537**:347-355.
- 318 2. Menschaert G, Fenyo D: **Proteogenomics from a bioinformatics angle: A growing field.**  
319 *Mass Spectrom Rev* 2015.



- 320 3. Nesvizhskii AI: **Proteogenomics: concepts, applications and computational strategies.**  
321 *Nat Methods* 2014, **11**:1114-1125.
- 322 4. Ruggles KV, Krug K, Wang X, Clauser KR, Wang J, Payne SH, Fenyo D, Zhang B, Mani DR:  
323 **Methods, tools and current perspectives in proteogenomics.** *Mol Cell Proteomics* 2017.
- 324 5. Wang X, Slebos RJ, Wang D, Halvey PJ, Tabb DL, Liebler DC, Zhang B: **Protein**  
325 **identification using customized protein sequence databases derived from RNA-Seq**  
326 **data.** *J Proteome Res* 2012, **11**:1009-1017.
- 327 6. Crappe J, Ndah E, Koch A, Steyaert S, Gawron D, De Keulenaer S, De Meester E, De  
328 Meyer T, Van Criekinge W, Van Damme P, Menschaert G: **PROTEOFORMER: deep**  
329 **proteome coverage through ribosome profiling and MS integration.** *Nucleic Acids Res*  
330 2015, **43**:e29.
- 331 7. Olexiouk V, Crappe J, Verbruggen S, Verhegen K, Martens L, Menschaert G: **sORFs.org: a**  
332 **repository of small ORFs identified by ribosome profiling.** *Nucleic Acids Res* 2016,  
333 **44**:D324-329.
- 334 8. Volders PJ, Verheggen K, Menschaert G, Vandepoele K, Martens L, Vandesompele J,  
335 Mestdagh P: **An update on LNCipedia: a database for annotated human lncRNA**  
336 **sequences.** *Nucleic Acids Res* 2015, **43**:D174-180.
- 337 9. Mertins P, Mani DR, Ruggles KV, Gillette MA, Clauser KR, Wang P, Wang X, Qiao JW, Cao  
338 S, Petralia F, et al: **Proteogenomics connects somatic mutations to signalling in breast**  
339 **cancer.** *Nature* 2016, **534**:55-62.
- 340 10. Zhang B, Wang J, Wang X, Zhu J, Liu Q, Shi Z, Chambers MC, Zimmerman LJ, Shaddox KF,  
341 Kim S, et al: **Proteogenomic characterization of human colon and rectal cancer.** *Nature*  
342 2014, **513**:382-387.

- 343 11. Zhang H, Liu T, Zhang Z, Payne SH, Zhang B, McDermott JE, Zhou JY, Petyuk VA, Chen L,  
344 Ray D, et al: **Integrated Proteogenomic Characterization of Human High-Grade Serous**  
345 **Ovarian Cancer**. *Cell* 2016, **166**:755-765.
- 346 12. Barbieri R, Guryev V, Brandsma CA, Suits F, Bischoff R, Horvatovich P: **Proteogenomics:**  
347 **Key Driver for Clinical Discovery and Personalized Medicine**. *Adv Exp Med Biol* 2016,  
348 **926**:21-47.
- 349 13. Deutsch EW, Albar JP, Binz PA, Eisenacher M, Jones AR, Mayer G, Omenn GS, Orchard S,  
350 Vizcaino JA, Hermjakob H: **Development of data representation standards by the**  
351 **human proteome organization proteomics standards initiative**. *J Am Med Inform Assoc*  
352 2015, **22**:495-506.
- 353 14. Martens L, Chambers M, Sturm M, Kessner D, Levander F, Shofstahl J, Tang WH, Rompp  
354 A, Neumann S, Pizarro AD, et al: **mzML--a community standard for mass spectrometry**  
355 **data**. *Mol Cell Proteomics* 2011, **10**:R110 000133.
- 356 15. Jones AR, Eisenacher M, Mayer G, Kohlbacher O, Siepen J, Hubbard SJ, Selley JN, Searle  
357 BC, Shofstahl J, Seymour SL, et al: **The mzIdentML data standard for mass**  
358 **spectrometry-based proteomics results**. *Mol Cell Proteomics* 2012, **11**:M111 014381.
- 359 16. Griss J, Jones AR, Sachsenberg T, Walzer M, Gatto L, Hartler J, Thallinger GG, Salek RM,  
360 Steinbeck C, Neuhauser N, et al: **The mzTab data exchange format: communicating**  
361 **mass-spectrometry-based proteomics and metabolomics experimental results to a**  
362 **wider audience**. *Mol Cell Proteomics* 2014, **13**:2765-2775.
- 363 17. Walzer M, Qi D, Mayer G, Uszkoreit J, Eisenacher M, Sachsenberg T, Gonzalez-Galarza FF,  
364 Fan J, Bessant C, Deutsch EW, et al: **The mzQuantML data standard for mass**  
365 **spectrometry-based quantitative studies in proteomics**. *Mol Cell Proteomics* 2013,  
366 **12**:2332-2340.

- 367 18. Kim MS, Pinto SM, Getnet D, Nirujogi RS, Manda SS, Chaerkady R, Madugundu AK,  
368 Kelkar DS, Isserlin R, Jain S, et al: **A draft map of the human proteome.** *Nature* 2014,  
369 **509**:575-581.
- 370 19. Wilhelm M, Schlegl J, Hahne H, Gholami AM, Lieberenz M, Savitski MM, Ziegler E,  
371 Butzmann L, Gessulat S, Marx H, et al: **Mass-spectrometry-based draft of the human**  
372 **proteome.** *Nature* 2014, **509**:582-587.
- 373 20. **The SAM/BAM Format Specification Working Group (2014) Sequence alignment/map**  
374 **format specification** [<http://samtools.github.io/hts-specs/SAMv1.pdf>]
- 375 21. Li H, Handsaker B, Wysoker A, Fennell T, Ruan J, Homer N, Marth G, Abecasis G, Durbin  
376 R, Genome Project Data Processing S: **The Sequence Alignment/Map format and**  
377 **SAMtools.** *Bioinformatics* 2009, **25**:2078-2079.
- 378 22. **BED format** [[http://genome.ucsc.edu/FAQ/FAQformat.html - format1](http://genome.ucsc.edu/FAQ/FAQformat.html#format1)]
- 379 23. Quinlan AR: **BEDTools: The Swiss-Army Tool for Genome Feature Analysis.** *Curr Protoc*  
380 *Bioinformatics* 2014, **47**:11 12 11-34.
- 381 24. Quinlan AR, Hall IM: **BEDTools: a flexible suite of utilities for comparing genomic**  
382 **features.** *Bioinformatics* 2010, **26**:841-842.
- 383 25. Aken BL, Achuthan P, Akanni W, Amode MR, Bernsdorff F, Bhai J, Billis K, Carvalho-Silva  
384 D, Cummins C, Clapham P, et al: **Ensembl 2017.** *Nucleic Acids Res* 2017, **45**:D635-D642.
- 385 26. Tyner C, Barber GP, Casper J, Clawson H, Diekhans M, Eisenhart C, Fischer CM, Gibson D,  
386 Gonzalez JN, Guruvadoo L, et al: **The UCSC Genome Browser database: 2017 update.**  
387 *Nucleic Acids Res* 2017, **45**:D626-D634.
- 388 27. Skinner ME, Uzilov AV, Stein LD, Mungall CJ, Holmes IH: **JBrowse: a next-generation**  
389 **genome browser.** *Genome Res* 2009, **19**:1630-1638.

- 390 28. Robinson JT, Thorvaldsdottir H, Winckler W, Guttman M, Lander ES, Getz G, Mesirov JP:  
391 **Integrative genomics viewer.** *Nat Biotechnol* 2011, **29**:24-26.
- 392 29. Vizcaino JA, Martens L, Hermjakob H, Julian RK, Paton NW: **The PSI formal document**  
393 **process and its implementation on the PSI website.** *Proteomics* 2007, **7**:2355-2357.
- 394 30. Mayer G, Montecchi-Palazzi L, Ovelleiro D, Jones AR, Binz PA, Deutsch EW, Chambers M,  
395 Kallhardt M, Levander F, Shofstahl J, et al: **The HUPO proteomics standards initiative-**  
396 **mass spectrometry controlled vocabulary.** *Database (Oxford)* 2013, **2013**:bat009.
- 397 31. Wang X, Slebos RJ, Chambers MC, Tabb DL, Liebner DC, Zhang B: **proBAMsuite, a**  
398 **Bioinformatics Framework for Genome-Based Representation and Analysis of**  
399 **Proteomics Data.** *Mol Cell Proteomics* 2016, **15**:1164-1175.
- 400 32. Kent WJ, Zweig AS, Barber G, Hinrichs AS, Karolchik D: **BigWig and BigBed: enabling**  
401 **browsing of large distributed datasets.** *Bioinformatics* 2010, **26**:2204-2207.
- 402 33. Ghali F, Krishna R, Perkins S, Collins A, Xia D, Wastling J, Jones AR: **ProteoAnnotator--**  
403 **open source proteogenomics annotation software supporting PSI standards.**  
404 *Proteomics* 2014, **14**:2731-2741.
- 405 34. Perez-Riverol Y, Uszkoreit J, Sanchez A, Ternent T, Del Toro N, Hermjakob H, Vizcaino JA,  
406 Wang R: **ms-data-core-api: an open-source, metadata-oriented library for**  
407 **computational proteomics.** *Bioinformatics* 2015, **31**:2903-2905.
- 408 35. Deutsch EW, Mendoza L, Shteynberg D, Farrah T, Lam H, Tasman N, Sun Z, Nilsson E,  
409 Pratt B, Prazen B, et al: **A guided tour of the Trans-Proteomic Pipeline.** *Proteomics* 2010,  
410 **10**:1150-1159.
- 411 36. Olexiouk V, Menschaert G: **proBAMconvert: a conversion tool for proBAM/proBed.** *J*  
412 *Proteome Res* 2017.

- 413 37. Vizcaino JA, Csordas A, Del-Toro N, Dianes JA, Griss J, Lavidas I, Mayer G, Perez-Riverol Y,  
414 Reisinger F, Ternent T, et al: **2016 update of the PRIDE database and its related tools.**  
415 *Nucleic Acids Res* 2016, **44**:11033.
- 416 38. Deutsch EW, Lam H, Aebersold R: **PeptideAtlas: a resource for target selection for**  
417 **emerging targeted proteomics workflows.** *EMBO Rep* 2008, **9**:429-434.
- 418 39. Okuda S, Watanabe Y, Moriya Y, Kawano S, Yamamoto T, Matsumoto M, Takami T,  
419 Kobayashi D, Araki N, Yoshizawa AC, et al: **jPOSTrepo: an international standard data**  
420 **repository for proteomes.** *Nucleic Acids Res* 2017, **45**:D1107-D1111.
- 421 40. Vizcaino JA, Deutsch EW, Wang R, Csordas A, Reisinger F, Rios D, Dianes JA, Sun Z, Farrah  
422 T, Bandeira N, et al: **ProteomeXchange provides globally coordinated proteomics data**  
423 **submission and dissemination.** *Nat Biotechnol* 2014, **32**:223-226.
- 424 41. Martens L, Vizcaino JA: **A Golden Age for Working with Public Proteomics Data.** *Trends*  
425 *Biochem Sci* 2017, **42**:333-341.
- 426 42. Vaudel M, Verheggen K, Csordas A, Raeder H, Berven FS, Martens L, Vizcaino JA, Barsnes  
427 H: **Exploring the potential of public proteomics data.** *Proteomics* 2016, **16**:214-225.

428

## 429 **Figure Titles and Legends:**

430

### 431 **Figure 1. Overview of the proBAM and proBed proteogenomics standard formats.**

432 Both proBAM and proBed can be created from well-established proteomics standard  
433 formats containing peptide and protein identification information (mzTab and  
434 mzIdentML, blue box), which are derived from their corresponding MS-data spectrum  
435 files (mzML, brown box). The proBAM and proBed formats (green box) contain similar  
436 PSM related and genomic mapping information, yet proBAM contains more details,

437 including enzymatic (protease) information, key in proteomics experiments (enzyme  
438 type, mis-cleavages, enzymatic termini, etc) and mapping details (CIGAR, flag, etc).  
439 Additionally, proBAM is able to hold a full MS-based proteomics identification result  
440 set, enabling further downstream analysis in addition to genome-centric visualization, as  
441 it is also the purpose for proBed (purple box).

442

443 **Figure 2. Fields of proBAM and proBed format.** A proBed file holds 12 original BED  
444 columns (highlighted by a bold box) and 13 additional proBed columns. The proBAM  
445 alignment record contains 11 original BAM columns (highlighted by a bold box) and 21  
446 proBAM-specific columns, using the TAG:TYPE:VALUE format. Each row in the table  
447 represents a column in proBAM and proBed. The rows are colored to reflect the  
448 categories of information provided in the two formats (see color legend at the bottom, the  
449 header section of proBAM format is not included here). The rows without any  
450 background color in the proBAM table represent original BAM columns that are not used  
451 in proBAM but that are retained for compatibility. The last row in grey indicates the  
452 customized columns that could be potentially used.

453

454 **Figure 3. Visualization of proBAM and proBed files in genome browsers.** a) IGV  
455 visualisation: proBAM (green box) and proBed (red box) files coming from the same  
456 dataset (accession number PXD001524 in the PRIDE database). proBed files are usually  
457 loaded as annotation tracks in IGV whereas proBAM files are loaded in the mapping  
458 section. b) Ensembl visualization: proBAM (green box) and proBed (red box) files  
459 derived from the same dataset (accession number PXD000124) illustrating a novel

460 translational event. The N-terminal proteomics identification result points to an  
461 alternative translation initiation site (TIS) for the gene HDGF at a near-cognate start-site  
462 located in the 5'-UTR of the transcript (blue box).

HUPO-PSI  
MS output  
standard  
format

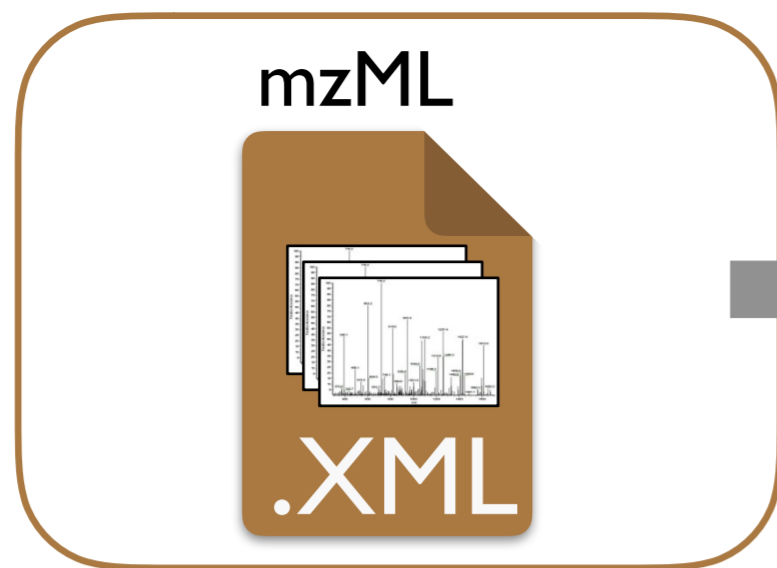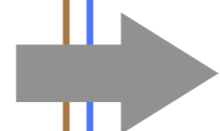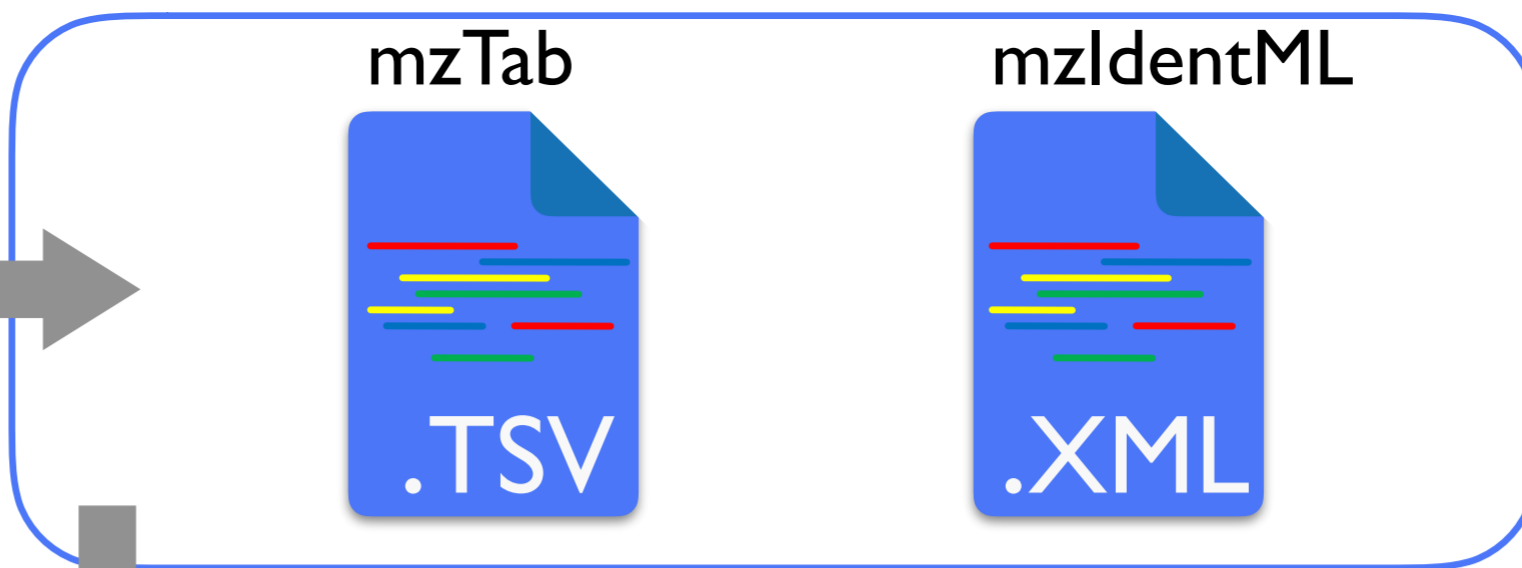

HUPO-PSI  
MS identifications  
standard  
formats

proBed

doi: <https://doi.org/10.1101/152579>; this version posted June 20, 2017. The copyright holder for this preprint (which was not certified by peer review) is the author/funder, who has granted bioRxiv a license to display the preprint in perpetuity. It is made available under aCC-BY 4.0 International license.

**3 strictly mandatory fields from original BED format**

chrom  
chromStart  
chromEnd

**9 extra core BED fields**

name  
score  
strand  
thickStart  
thickEnd  
reserved  
blockCount  
blockSizes  
chromStarts

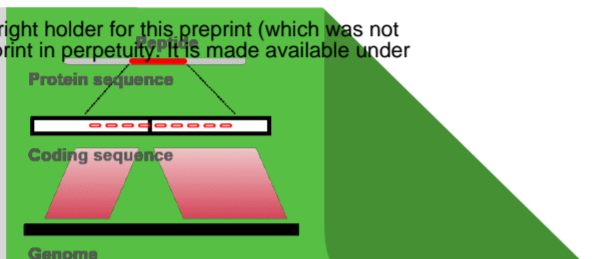

**13 extra proBed fields**

proteinAccession  
peptideSequence  
uniqueness  
genomeReferenceVersion  
psmScore  
fdr  
modifications  
charge  
expMassToCharge  
calcMassToCharge  
psmRank  
datasetID  
uri

original BED

proBed specific

.TSV

- PSM or peptide level
- encouraged to only export valid results

proBAM

**HEADER section**

@HD VN SO (header line)  
@SQ SN LN AS SP (reference sequence lines)  
@PG ID VN CL (program line)  
@CO (comment lines)

follows a TAG:VALUE format (except @CO), where TAG is two-letter abbrev.

**ALIGNMENT section**

**11 mandatory fields from original SAM/BAM format**

QNAME CIGAR  
FLAG RNEXT  
RNAME PNEXT  
POS TLEN  
MAPQ SEQ  
QUAL

original BAM

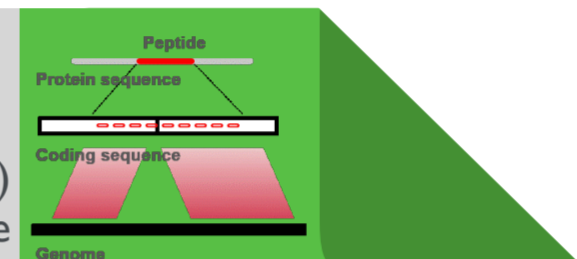

@GA AS VN AD (genome annotation line)

**extra mandatory proteogenomics fields**

follow a TAG:TYPE:VALUE format (analogous to SAM)

List of tags:

NH XA XB XC XE  
XF XG XI XL XM  
XN XO XP XQ XR  
XS XT XU YA YB  
YP Z?

proBAM specific

.TSV

- PSM or peptide level
- possible to export only valid or full results

HUPO-PSI  
proteogenomics  
standard  
formats

Visualization

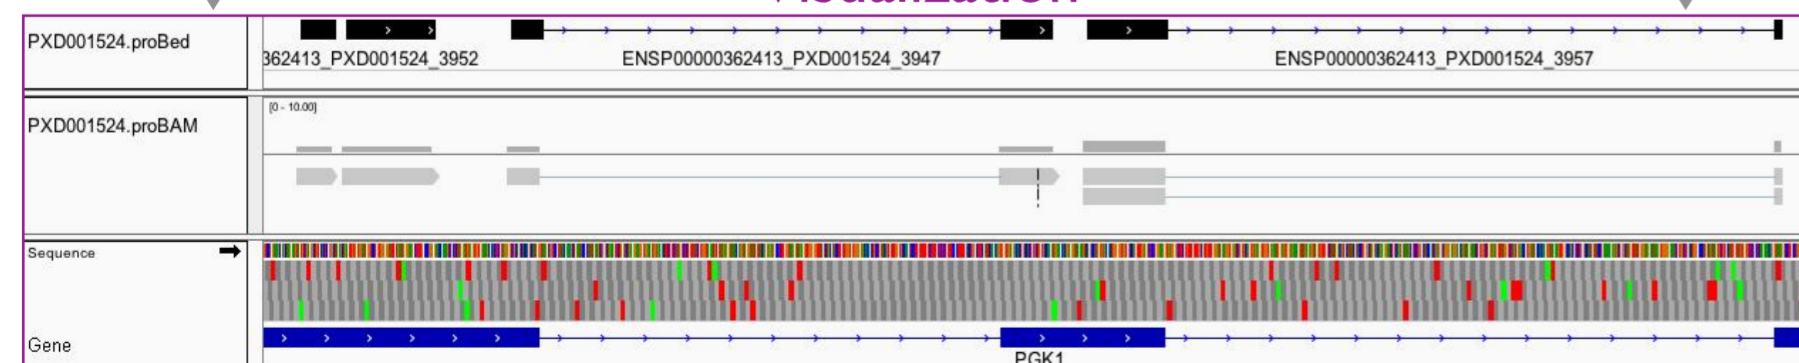

- for annotation/visualization purposes as genome browser tracks

Downstream analysis

- **interpretation:** gene, transcript isoform inference
- **integration:** co-analyse with gen-, transcript-, translat-omics data

- annotation/visualization based on valid results
- downstream (re-)analysis based on full results

purpose



| proBAM | Description                                                      | Example                                                     |
|--------|------------------------------------------------------------------|-------------------------------------------------------------|
| QNAME  | Spectrum name                                                    | index=7096_PXD001524                                        |
| FLAG   | Bitwise FLAG                                                     | 16                                                          |
| RNAME  | Reference sequence NAME                                          | chr21                                                       |
| POS    | 1-based leftmost mapping POSition                                | 33907431                                                    |
| MAPQ   | -                                                                | 255                                                         |
| CIGAR  | CIGAR string                                                     | 23M1628N28M                                                 |
| RNEXT  | -                                                                | *                                                           |
| PNEXT  | -                                                                | 0                                                           |
| TLEN   | -                                                                | 0                                                           |
| SEQ    | Coding sequence                                                  | TCGACCATTTTCAGCAAG<br>CAAATTGATCAGATTGGT<br>AGTGAGGGGAGAGAA |
| QUAL   | -                                                                | *                                                           |
| XL     | Number of peptides to which the spectrum maps                    | XL:i:1                                                      |
| XM     | Modification(s): semicolon-separated list of modifications       | XM:Z:*                                                      |
| XB     | Mass error (experimental - calculated)                           | XB:f:0.0002109709                                           |
| XQ     | PSM FDR (i.e. q-value or 1-PEP)                                  | XQ:f:1.06E-04                                               |
| XS     | PSM score                                                        | XS:f: 79.78288685                                           |
| NH     | Number of genomic locations to which the peptide sequence maps   | NH:i:1                                                      |
| XO     | Peptide uniqueness (1...5)                                       | XO:Z:unique                                                 |
| XC     | Peptide Charge                                                   | XC:i:2                                                      |
| XI     | Peptide intensity                                                | XI:f:*                                                      |
| XP     | Peptide sequence from the original search result                 | XP:Z:FSPLTTNLINLLAENGR                                      |
| XR     | Reference peptide sequence                                       | XR:Z:FSPLTTNLINLLAENGR                                      |
| XF     | Reading frame of the peptide (0, 1, 2)                           | XF:Z:0,1                                                    |
| XA     | Whether the peptide is well annotated (0,1,2)                    | XA:i:0                                                      |
| XG     | Peptide type (N, V, W, J, A, M, C, E, B, O, T, R, I, G, D, U, X) | XG:Z:N                                                      |
| YP     | Protein accession ID from the original search                    | YP:Z:ENSP00000290299                                        |
| XE     | Enzyme used in the experiment                                    | XE:i:1                                                      |
| XN     | Number of missed cleavages in the peptide                        | XN:i:0                                                      |
| XT     | Enzyme specificity (0, 1, 2, 3)                                  | XT:i:3                                                      |
| YA     | Following amino acids (2 AA)                                     | YA:Z:LS                                                     |
| YB     | Preceding amino acids (2 AA)                                     | YB:Z:ER                                                     |
| XU     | Uniform Resource Identifier                                      | .                                                           |
| Z?     | Custom fields                                                    | .                                                           |

| proBed                 | Description                           | Example                |
|------------------------|---------------------------------------|------------------------|
| chrom                  | Reference sequence chromosome         | chr21                  |
| chromStart             | Start position of the first DNA base  | 33907430               |
| chromEnd               | End position of the last DNA base     | 33909107               |
| name                   | Unique name                           | ENSP00000290299_3845   |
| score                  | Score                                 | 276                    |
| strand                 | + or - for strand                     | -                      |
| thickStart             | Coding region start                   | 33907430               |
| thickEnd               | Coding region end                     | 33909107               |
| reserved               | Always 0                              | 0                      |
| blockCount             | Number of blocks                      | 2                      |
| blockSizes             | Block sizes                           | 25,26                  |
| chromStarts            | Block starts                          | 0,1651                 |
| psmScore               | PSM score                             | 79.78288685            |
| fdR                    | Estimated global false discovery rate | 1.06E-04               |
| modifications          | Post-translational modifications      | 15-UNIMOD:7            |
| expMassToCharge        | Experimental mass to charge value     | 936.499                |
| calcMassToCharge       | Calculated mass to charge value       | 936.497                |
| psmRank                | Peptide-Spectrum Match rank.          | 1                      |
| charge                 | Charge value                          | 2                      |
| peptideSequence        | Peptide sequence                      | FSPLTTNLINLLAENGR      |
| uniqueness             | Peptide uniqueness                    | unique                 |
| proteinAccession       | Protein accession number              | ENSP00000290299        |
| genomeReferenceVersion | Genome reference version number       | Homo_sapiens.GRCh38.77 |
| datasetID              | Dataset Identifier                    | PXD001524_reprocessed  |
| uri                    | Uniform Resource Identifier           | .                      |

| Color legend        |
|---------------------|
| Genomic locations   |
| Mapping details     |
| Nucleotide sequence |
| PSM information     |
| Peptide information |
| Protein information |
| Enzyme information  |
| Data source         |

# A.

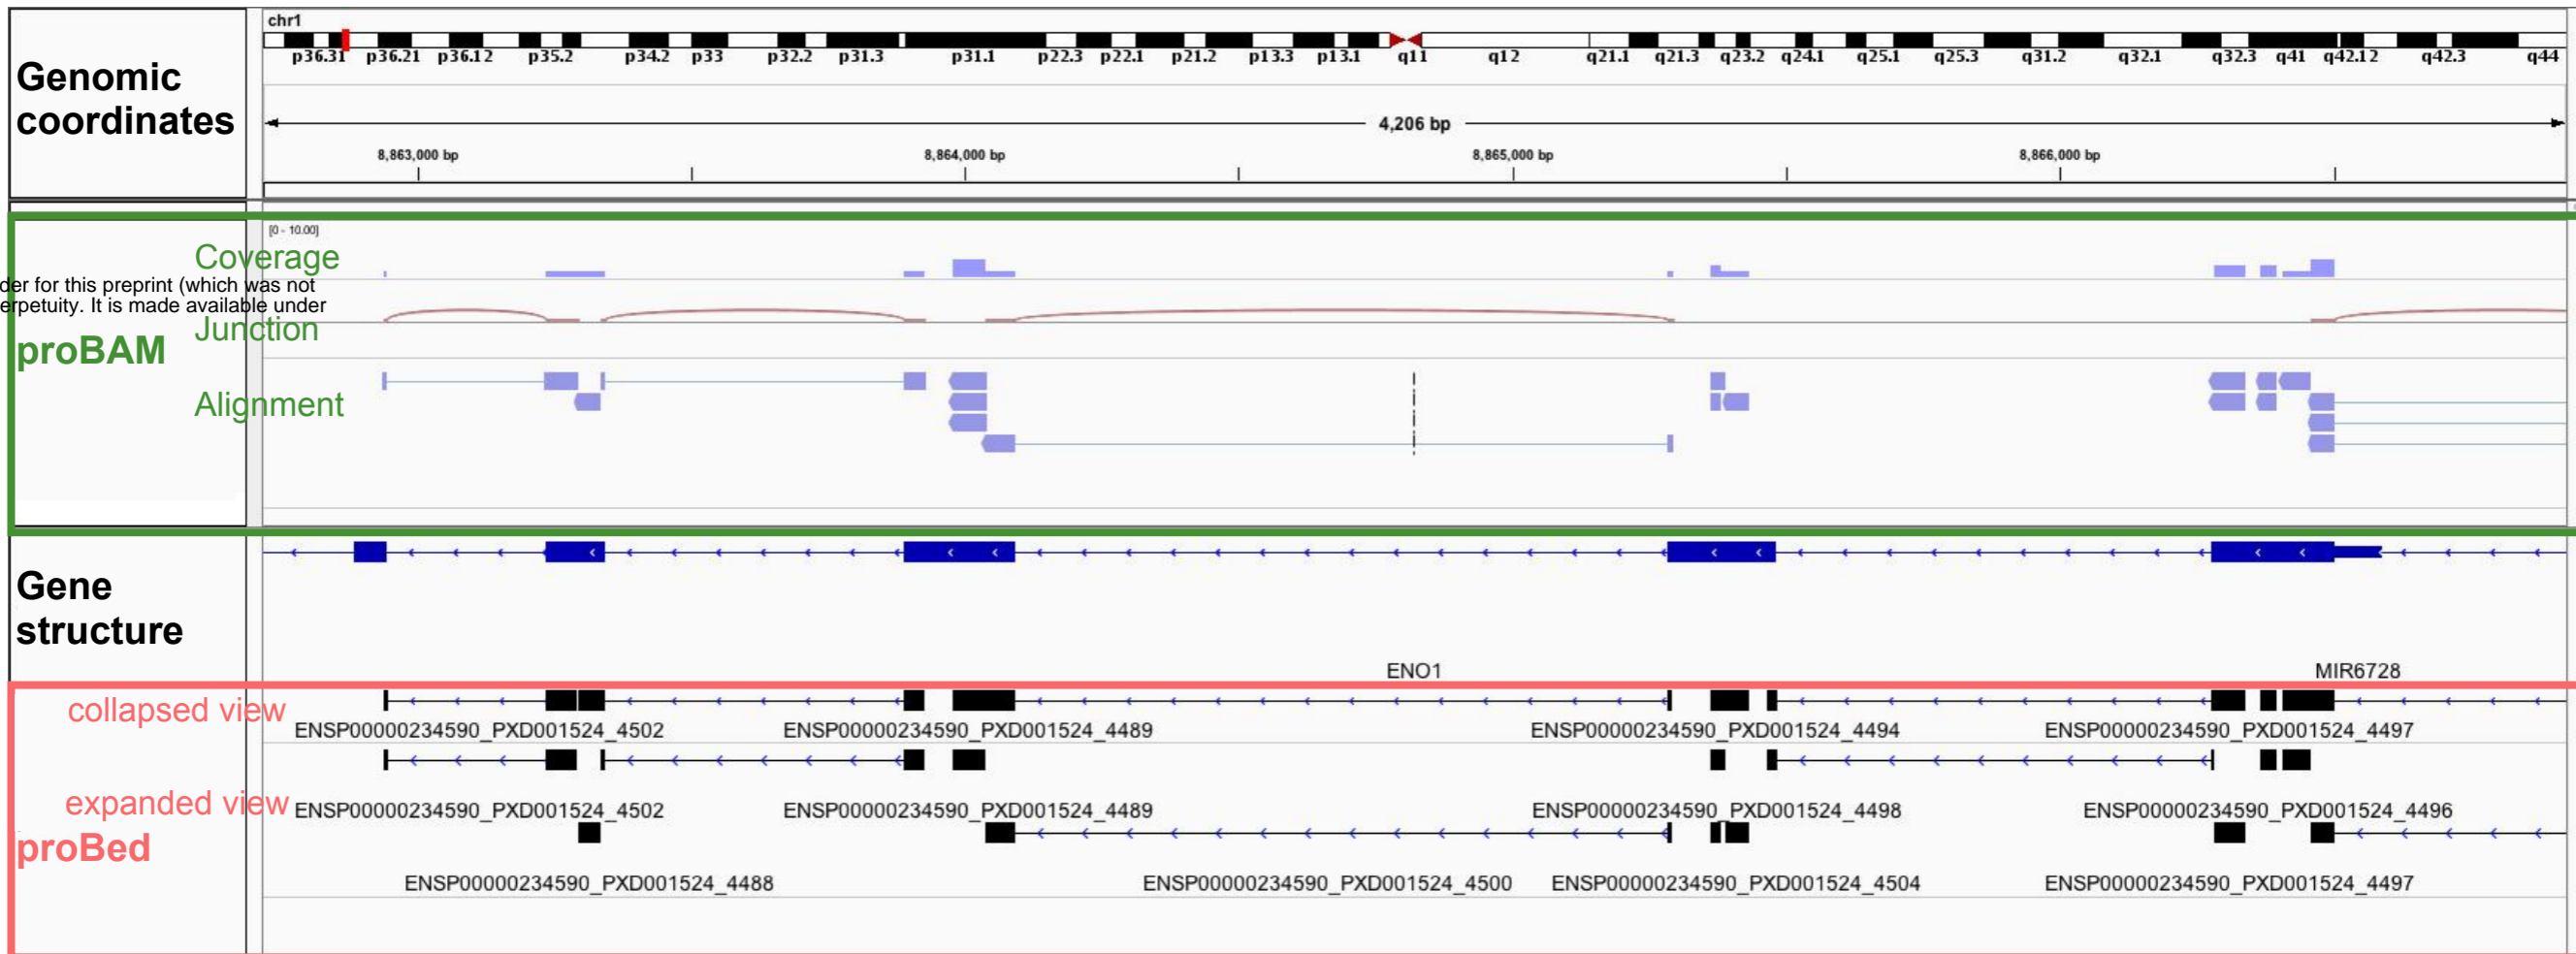

# B.

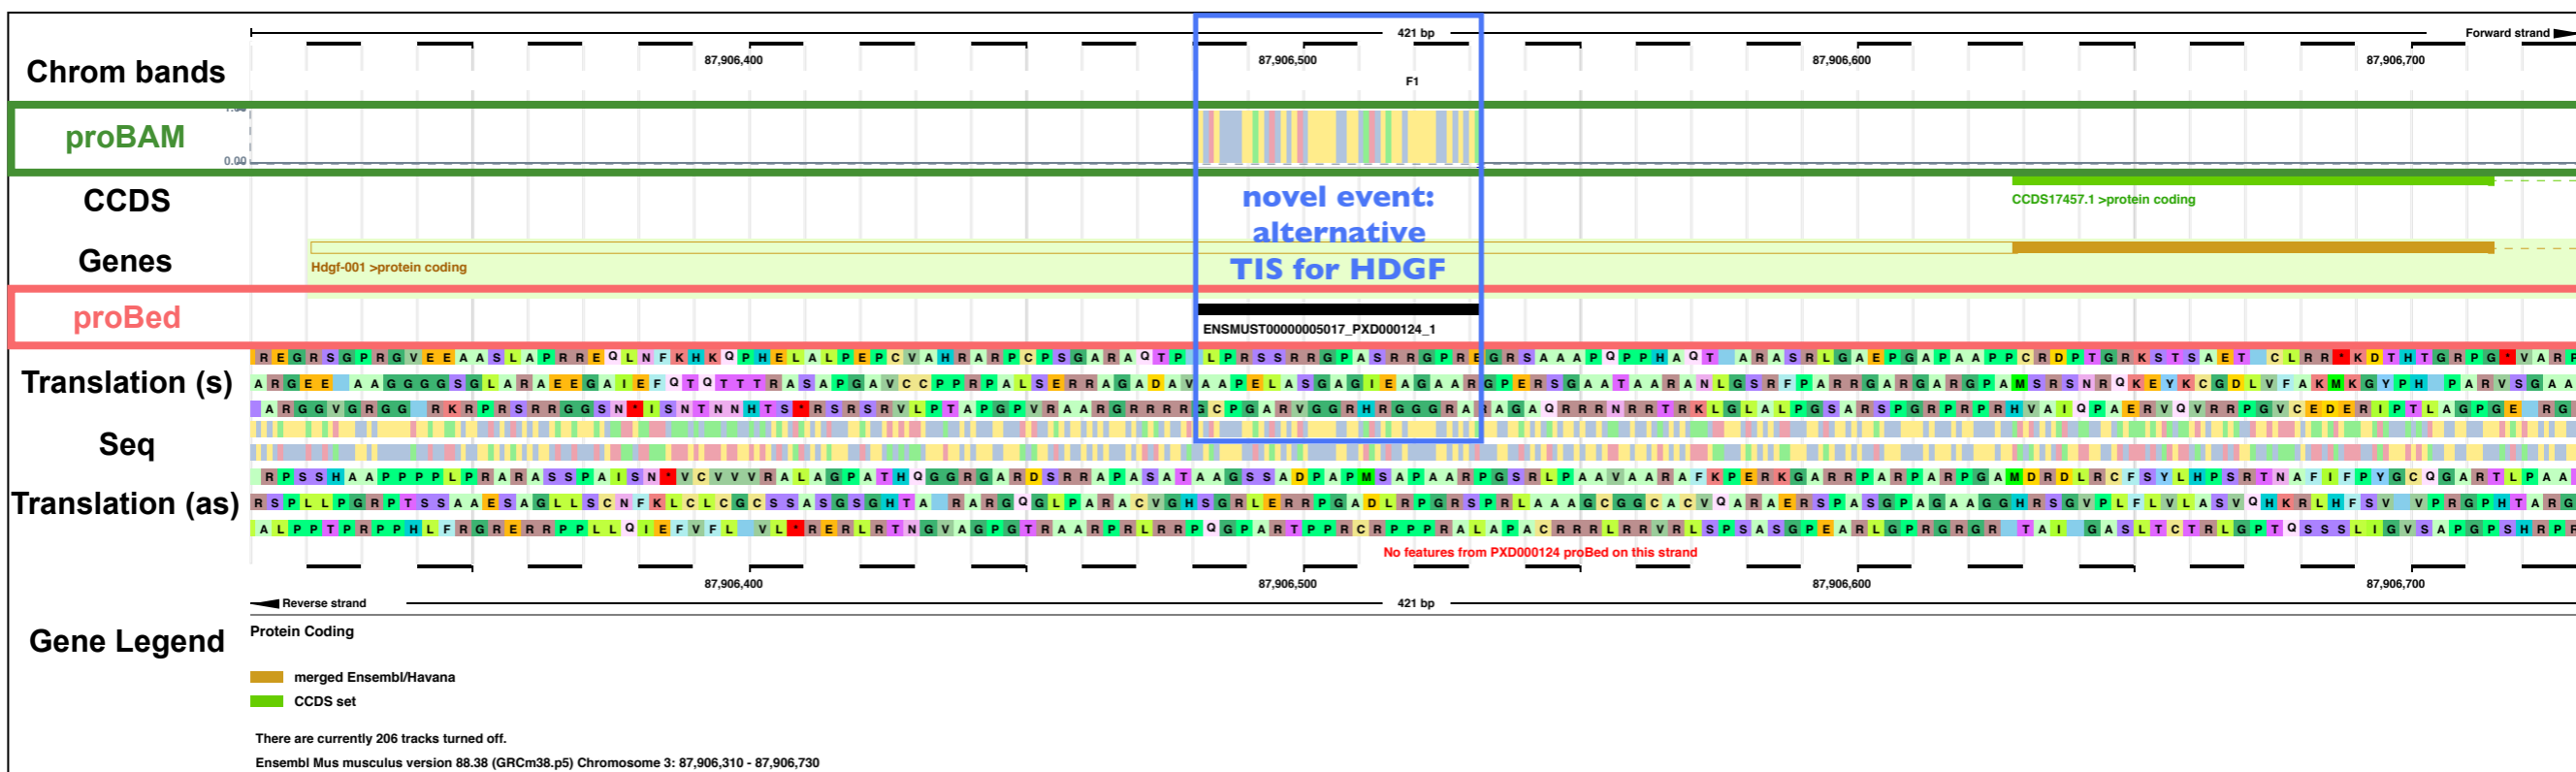

Source: https://www.biorxiv.org/content/10.1101/152579v1.full.pdf
